# Supplementary material for: Monitoring of adult emergence in the pine processionary moth between 1970 and 1984 in Mont Ventoux, France
Source: Biodivers Data J. 2021 Feb 17;9:e61086. doi: 10.3897/BDJ.9.e61086 (PMC7904747; doi:10.3897/BDJ.9.e61086)
Supplement: Supplementary material 7 — Table showing the percentage of direct emergence and the percentage of individuals emerging after one or more years of prolonged diapause for each site and cohort [file bdj-09-e61086-s007.csv]

Study site	Year of sampling	Category	Year of emergence	Number of individuals emerged	Percentage of emerged individuals
R923	1970	Direct emergence N	1970	291	90.94%
R923	1970	Prolonged diapause N+1	1971	26	8.13%
R923	1970	Prolonged diapause N+2	1972	3	0.94%
R923	1971	Direct emergence N	1971	213	97.26%
R923	1971	Prolonged diapause N+1	1972	2	0.91%
R923	1971	Prolonged diapause N+2	1973	4	1.83%
R923	1972	Direct emergence N	1972	806	73.34%
R923	1972	Prolonged diapause N+1	1973	292	26.57%
R923	1972	Prolonged diapause N+2	1974	1	0.09%
R923	1973	Direct emergence N	1973	251	92.62%
R923	1973	Prolonged diapause N+1	1974	20	7.38%
R923	1974	Direct emergence N	1974	312	69.96%
R923	1974	Prolonged diapause N+1	1975	82	18.39%
R923	1974	Prolonged diapause N+2	1976	52	11.66%
R923	1976	Direct emergence N	1976	658	74.86%
R923	1976	Prolonged diapause N+1	1977	79	8.99%
R923	1976	Prolonged diapause N+2	1978	142	16.15%
R923	1977	Direct emergence N	1977	295	70.24%
R923	1977	Prolonged diapause N+1	1978	104	24.76%
R923	1977	Prolonged diapause N+2	1979	21	5.00%
R923	1978	Direct emergence N	1978	588	98.16%
R923	1978	Prolonged diapause N+1	1979	6	1.00%
R923	1978	Prolonged diapause N+2	1980	4	0.67%
R923	1978	Prolonged diapause N+3	1981	1	0.17%
R923	1979	Direct emergence N	1979	678	94.96%
R923	1979	Prolonged diapause N+1	1981	36	5.04%
R923	1980	Direct emergence N	1980	521	84.44%
R923	1980	Prolonged diapause N+1	1981	82	13.29%
R923	1980	Prolonged diapause N+2	1982	14	2.27%
R923	1982	Direct emergence N	1982	238	86.86%
R923	1982	Prolonged diapause N+1	1983	33	12.04%
R923	1982	Prolonged diapause N+2	1984	3	1.09%
R923	1983	Direct emergence N	1983	289	95.38%
R923	1983	Prolonged diapause N+1	1984	14	4.62%
R923	1984	Direct emergence N	1984	569	97.93%
R923	1984	Prolonged diapause N+1	1985	12	2.07%
G445	1970	Direct emergence N	1970	448	97.82%
G445	1970	Prolonged diapause N+1	1971	9	1.97%
G445	1970	Prolonged diapause N+2	1972	1	0.22%
G445	1971	Direct emergence N	1971	249	100.00%
G445	1972	Direct emergence N	1972	546	91.76%
G445	1972	Prolonged diapause N+1	1973	49	8.24%
G445	1973	Direct emergence N	1973	472	99.79%
G445	1973	Prolonged diapause N+1	1974	1	0.21%
G445	1974	Direct emergence N	1974	813	96.21%
G445	1974	Prolonged diapause N+1	1975	31	3.67%
G445	1974	Prolonged diapause N+2	1976	1	0.12%
G445	1975	Direct emergence N	1975	272	85.27%
G445	1975	Prolonged diapause N+1	1976	44	13.79%
G445	1975	Prolonged diapause N+2	1977	3	0.94%
G445	1976	Direct emergence N	1976	568	99.47%
G445	1976	Prolonged diapause N+1	1978	3	0.53%
G445	1977	Direct emergence N	1977	452	84.49%
G445	1977	Prolonged diapause N+1	1978	80	14.95%
G445	1977	Prolonged diapause N+2	1979	3	0.56%
G445	1978	Direct emergence N	1978	569	95.63%
G445	1978	Prolonged diapause N+1	1979	22	3.70%
G445	1978	Prolonged diapause N+2	1980	4	0.67%
G445	1979	Direct emergence N	1979	304	99.35%
G445	1979	Prolonged diapause N+1	1980	1	0.33%
G445	1979	Prolonged diapause N+2	1981	1	0.33%
G445	1980	Direct emergence N	1980	487	95.68%
G445	1980	Prolonged diapause N+1	1981	22	4.32%
G445	1982	Direct emergence N	1982	730	98.65%
G445	1982	Prolonged diapause N+1	1983	10	1.35%
G445	1983	Direct emergence N	1983	141	97.92%
G445	1983	Prolonged diapause N+1	1984	3	2.08%
G445	1984	Direct emergence N	1984	125	100.00%
F781	1970	Direct emergence N	1970	250	78.37%
F781	1970	Prolonged diapause N+1	1971	54	16.93%
F781	1970	Prolonged diapause N+2	1972	11	3.45%
F781	1970	Prolonged diapause N+3	1973	4	1.25%
F781	1971	Direct emergence N	1971	509	99.41%
F781	1971	Prolonged diapause N+1	1972	1	0.20%
F781	1971	Prolonged diapause N+2	1973	2	0.39%
F781	1972	Direct emergence N	1972	597	97.23%
F781	1972	Prolonged diapause N+1	1973	17	2.77%
F781	1973	Direct emergence N	1973	600	85.84%
F781	1973	Prolonged diapause N+1	1974	99	14.16%
F781	1974	Direct emergence N	1974	563	86.88%
F781	1974	Prolonged diapause N+1	1975	81	12.50%
F781	1974	Prolonged diapause N+2	1976	4	0.62%
F781	1976	Direct emergence N	1976	743	96.74%
F781	1976	Prolonged diapause N+1	1977	5	0.65%
F781	1976	Prolonged diapause N+2	1978	20	2.60%
F781	1977	Direct emergence N	1977	242	76.34%
F781	1977	Prolonged diapause N+1	1978	72	22.71%
F781	1977	Prolonged diapause N+2	1979	3	0.95%
F781	1978	Direct emergence N	1978	593	35.74%
F781	1978	Prolonged diapause N+1	1979	282	17.00%
F781	1978	Prolonged diapause N+2	1980	713	42.98%
F781	1978	Prolonged diapause N+3	1981	71	4.28%
F781	1979	Direct emergence N	1979	629	97.67%
F781	1979	Prolonged diapause N+1	1981	15	2.33%
F781	1980	Direct emergence N	1980	282	84.68%
F781	1980	Prolonged diapause N+1	1981	51	15.32%
F781	1982	Direct emergence N	1982	186	90.73%
F781	1982	Prolonged diapause N+1	1983	19	9.27%
F781	1983	Direct emergence N	1983	408	99.51%
F781	1983	Prolonged diapause N+1	1984	2	0.49%
F781	1984	Direct emergence N	1984	335	98.82%
F781	1984	Prolonged diapause N+1	1985	4	1.18%
C671	1970	Direct emergence N	1970	403	96.41%
C671	1970	Prolonged diapause N+1	1971	14	3.35%
C671	1970	Prolonged diapause N+2	1972	1	0.24%
C671	1971	Direct emergence N	1971	593	98.67%
C671	1971	Prolonged diapause N+1	1972	8	1.33%
C671	1972	Direct emergence N	1972	634	93.10%
C671	1972	Prolonged diapause N+1	1973	47	6.90%
C671	1974	Direct emergence N	1974	1067	97.44%
C671	1974	Prolonged diapause N+1	1975	26	2.37%
C671	1974	Prolonged diapause N+2	1976	2	0.18%
C671	1975	Direct emergence N	1975	177	99.44%
C671	1975	Prolonged diapause N+1	1976	1	0.56%
C671	1976	Direct emergence N	1976	557	99.64%
C671	1976	Prolonged diapause N+1	1977	2	0.36%
C671	1977	Direct emergence N	1977	631	86.56%
C671	1977	Prolonged diapause N+1	1978	90	12.35%
C671	1977	Prolonged diapause N+2	1979	8	1.10%
C671	1978	Direct emergence N	1978	979	89.24%
C671	1978	Prolonged diapause N+1	1979	81	7.38%
C671	1978	Prolonged diapause N+2	1980	37	3.37%
C671	1980	Direct emergence N	1980	334	92.01%
C671	1980	Prolonged diapause N+1	1981	29	7.99%
C671	1981	Direct emergence N	1981	311	94.53%
C671	1981	Prolonged diapause N+1	1982	18	5.47%
C671	1982	Direct emergence N	1982	601	99.17%
C671	1982	Prolonged diapause N+1	1983	5	0.83%
C671	1983	Direct emergence N	1983	179	92.75%
C671	1983	Prolonged diapause N+1	1984	14	7.25%
B697	1970	Direct emergence N	1970	377	89.76%
B697	1970	Prolonged diapause N+1	1971	40	9.52%
B697	1970	Prolonged diapause N+2	1972	3	0.71%
B697	1971	Direct emergence N	1971	455	86.50%
B697	1971	Prolonged diapause N+1	1972	65	12.36%
B697	1971	Prolonged diapause N+2	1973	6	1.14%
B697	1972	Direct emergence N	1972	1562	88.65%
B697	1972	Prolonged diapause N+1	1973	200	11.35%
B697	1973	Direct emergence N	1973	194	97.00%
B697	1973	Prolonged diapause N+1	1974	6	3.00%
B697	1974	Direct emergence N	1974	1075	97.02%
B697	1974	Prolonged diapause N+1	1975	33	2.98%
B697	1975	Direct emergence N	1975	455	86.50%
B697	1975	Prolonged diapause N+1	1976	67	12.74%
B697	1975	Prolonged diapause N+2	1977	4	0.76%
B697	1976	Direct emergence N	1976	1044	99.43%
B697	1976	Prolonged diapause N+1	1977	5	0.48%
B697	1976	Prolonged diapause N+2	1978	1	0.10%
B697	1977	Direct emergence N	1977	841	96.33%
B697	1977	Prolonged diapause N+1	1978	26	2.98%
B697	1977	Prolonged diapause N+2	1979	6	0.69%
B697	1978	Direct emergence N	1978	2269	97.84%
B697	1978	Prolonged diapause N+1	1979	24	1.03%
B697	1978	Prolonged diapause N+2	1980	25	1.08%
B697	1978	Prolonged diapause N+3	1981	1	0.04%
B697	1980	Direct emergence N	1980	10	100.00%
B697	1982	Direct emergence N	1982	202	96.19%
B697	1982	Prolonged diapause N+1	1983	6	2.86%
B697	1982	Prolonged diapause N+2	1984	2	0.95%
B697	1983	Direct emergence N	1983	477	98.15%
B697	1983	Prolonged diapause N+1	1984	9	1.85%
A688	1971	Direct emergence N	1971	1528	95.56%
A688	1971	Prolonged diapause N+1	1972	52	3.25%
A688	1971	Prolonged diapause N+2	1973	19	1.19%
A688	1972	Direct emergence N	1972	1188	76.40%
A688	1972	Prolonged diapause N+1	1973	367	23.60%
A688	1973	Direct emergence N	1973	114	94.21%
A688	1973	Prolonged diapause N+1	1974	7	5.79%
A688	1974	Direct emergence N	1974	858	95.87%
A688	1974	Prolonged diapause N+1	1975	36	4.02%
A688	1974	Prolonged diapause N+2	1976	1	0.11%
A688	1975	Direct emergence N	1975	358	84.04%
A688	1975	Prolonged diapause N+1	1976	65	15.26%
A688	1975	Prolonged diapause N+2	1977	3	0.70%
A688	1976	Direct emergence N	1976	779	94.65%
A688	1976	Prolonged diapause N+1	1977	16	1.94%
A688	1976	Prolonged diapause N+2	1978	28	3.40%
A688	1978	Direct emergence N	1978	1434	96.70%
A688	1978	Prolonged diapause N+1	1979	13	0.88%
A688	1978	Prolonged diapause N+2	1980	31	2.09%
A688	1978	Prolonged diapause N+3	1981	5	0.34%
A688	1979	Direct emergence N	1979	1003	90.77%
A688	1979	Prolonged diapause N+1	1980	11	1.00%
A688	1979	Prolonged diapause N+2	1981	91	8.24%
A688	1980	Direct emergence N	1980	86	97.73%
A688	1980	Prolonged diapause N+1	1981	2	2.27%
A688	1982	Direct emergence N	1982	680	92.52%
A688	1982	Prolonged diapause N+1	1983	48	6.53%
A688	1982	Prolonged diapause N+2	1984	7	0.95%
A688	1983	Direct emergence N	1983	300	86.46%
A688	1983	Prolonged diapause N+1	1984	47	13.54%
A688	1984	Direct emergence N	1984	270	93.10%
A688	1984	Prolonged diapause N+1	1985	20	6.90%
